# Supplementary material for: Efficient leaching process of rare earth, alkali and alkaline earth metals from phosphogypsum based on methanesulfonic acid (MSA) as green & eco-friendly lixiviant
Source: Royal Society of Chemistry journal article supplement (doi:10.1039/d2ra04124c), 2022-01-01
Supplement: d2ra04124c1.pdf [file d2ra04124c1.pdf]

## Supplementary Information

### Efficient Leaching Process of Rare Earth, Alkali and Alkaline Earth Metals from Phosphogypsum based on Methanesulfonic Acid (MSA) as Green & Eco-friendly Lixiviant

Jamal Ait Brahim<sup>a</sup>, Amal Merroune<sup>a</sup>, Rachid Boulif<sup>b</sup>, El Mahdi Mounir<sup>b</sup>, Redouane Beniazza<sup>a,\*</sup>

<sup>a</sup>High Throughput Multidisciplinary Research Laboratory(HTMR)/Institute of Science,  
Technology & Innovation (IST&I), Mohammed VI Polytechnic University (UM6P), Ben Guerir,  
43150, Morocco

<sup>b</sup>OCP Group, Jorf Lasfar, 24025 El Jadida – Morocco.

\*Corresponding author email: [redouane.beniazza@um6p.ma](mailto:redouane.beniazza@um6p.ma) (R. Beniazza)

### Supplementary figures captions

**Fig. S1.** Chemical structures of (a) MSA and (b) PTSA.

**Fig. S2.** Effect of S/L ratio on the leaching efficiency of REEs and metals impurities using (a) MSA, (b) PTSA and (c) HCl (operating conditions : 2 M, 120 min, 25 °C and 500 rpm).

**Fig. S3.** Effect of temperature on the leaching efficiency of REEs and metals impurities in the range 25-80 °C using (a) MSA, (b) PTSA and (c) HCl (operating conditions : 2 M, 1/8, 120 min, 500 rpm).

### Supplementary figures

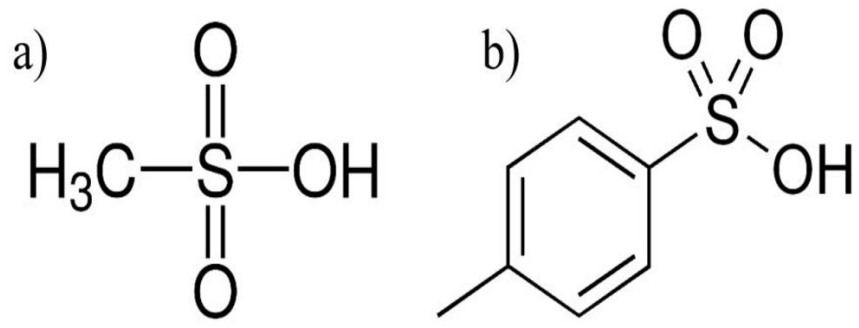

Fig. S1. Chemical structures of (a) MSA and (b) PTSA.

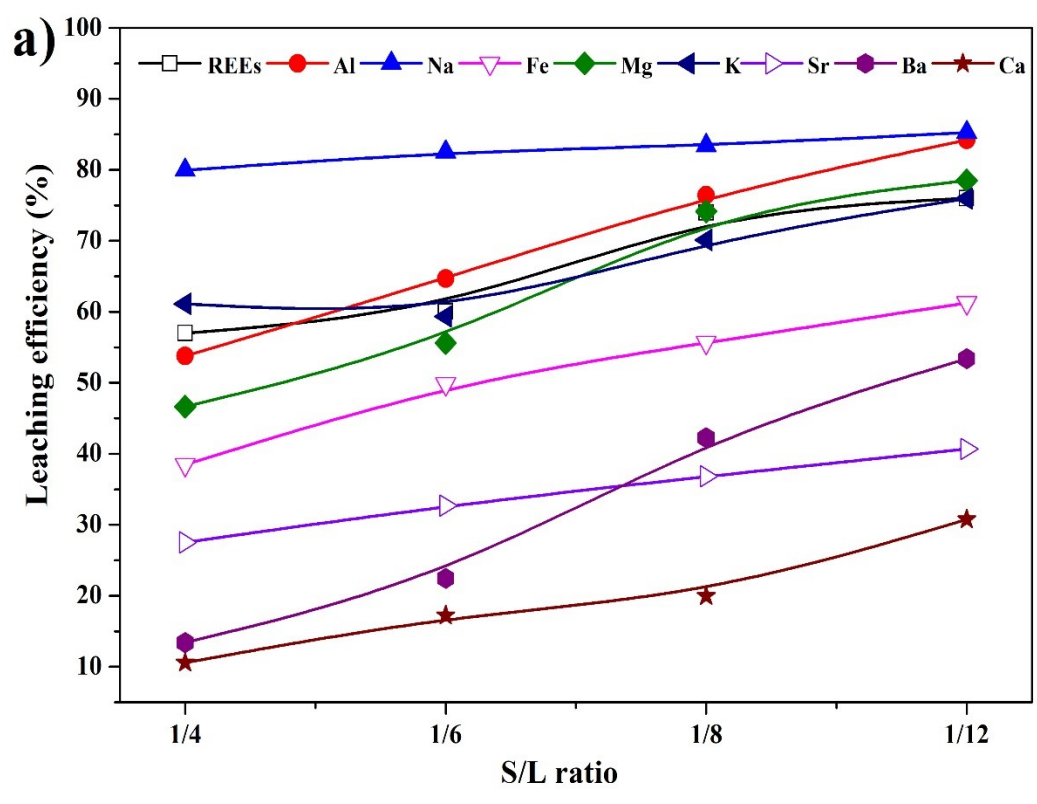

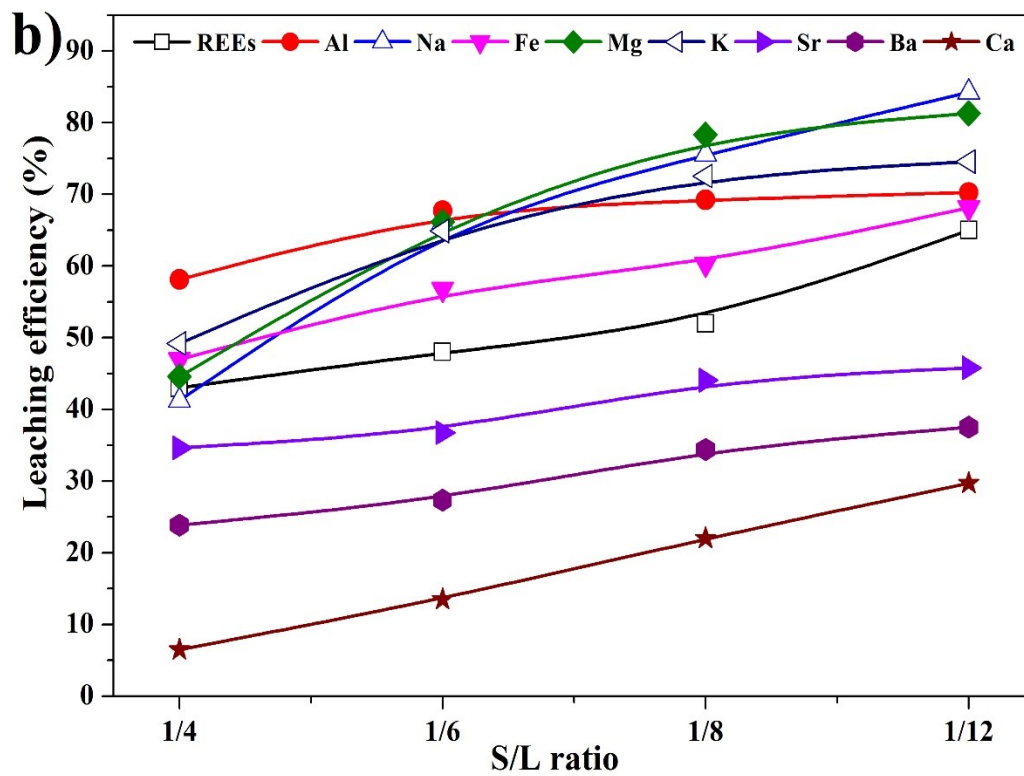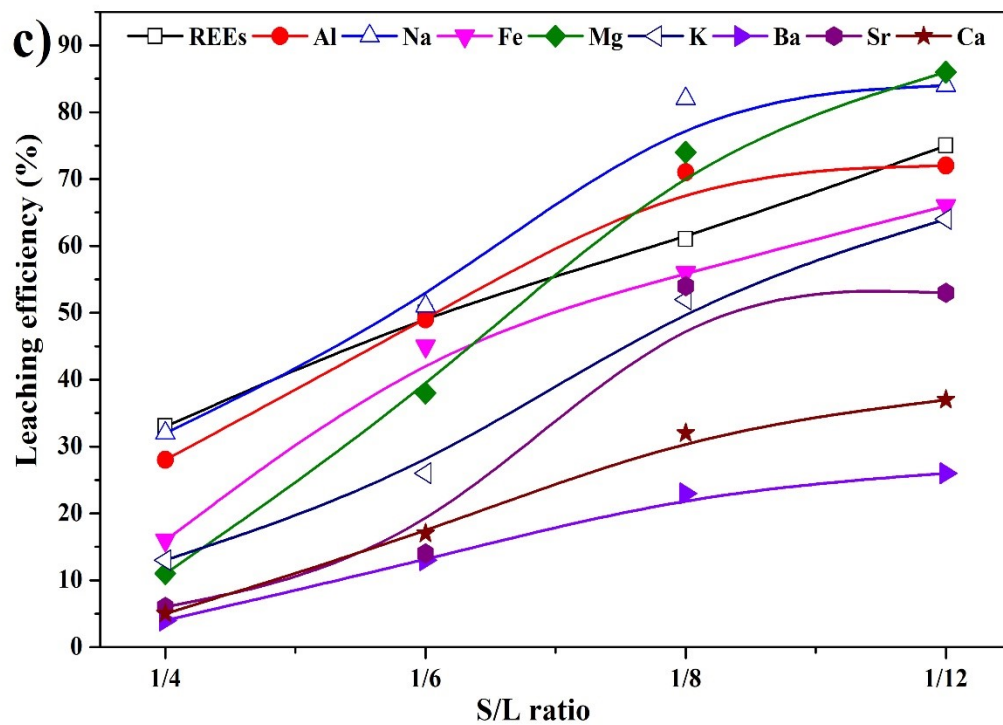

**Fig. S2.** Effect of S/L ratio on the leaching efficiency of REEs and metals impurities using (a) MSA, (b) PTSA and (c) HCl (operating conditions : 2 M, 120 min, 25 °C and 500 rpm).

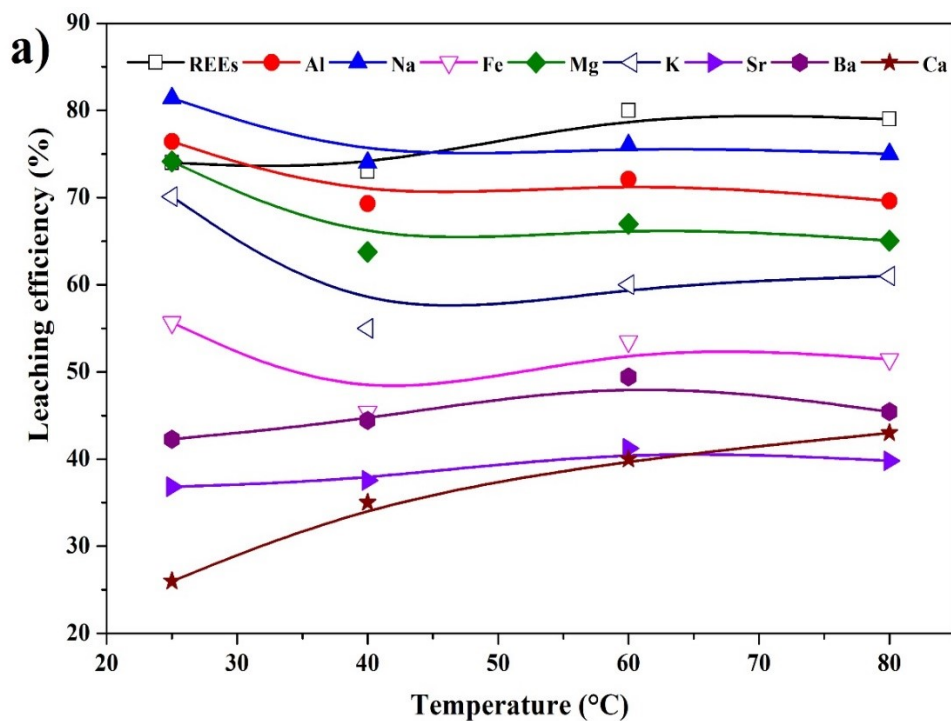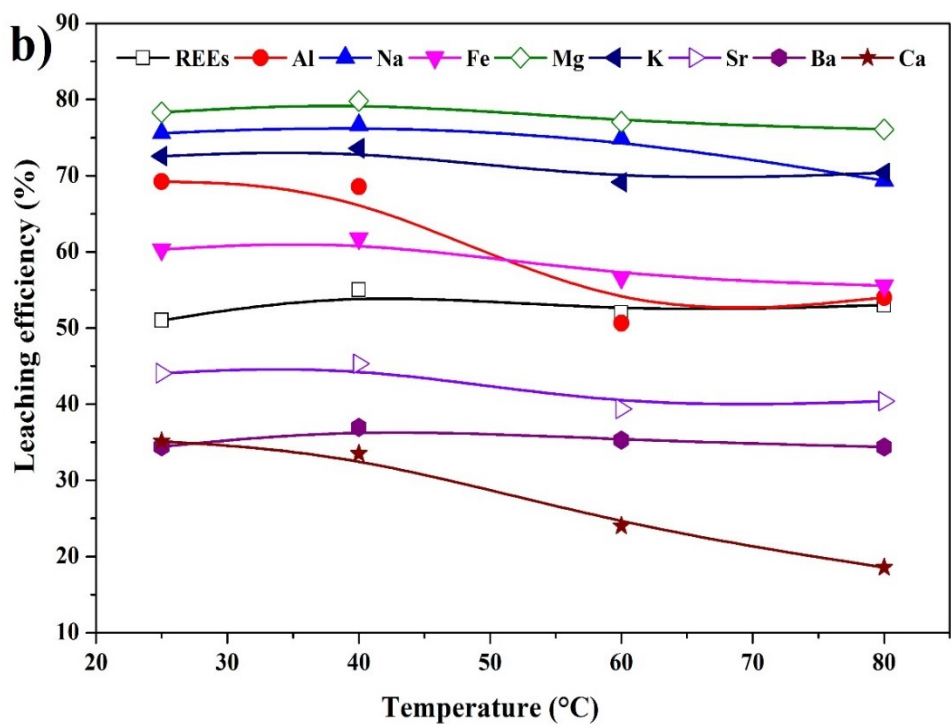

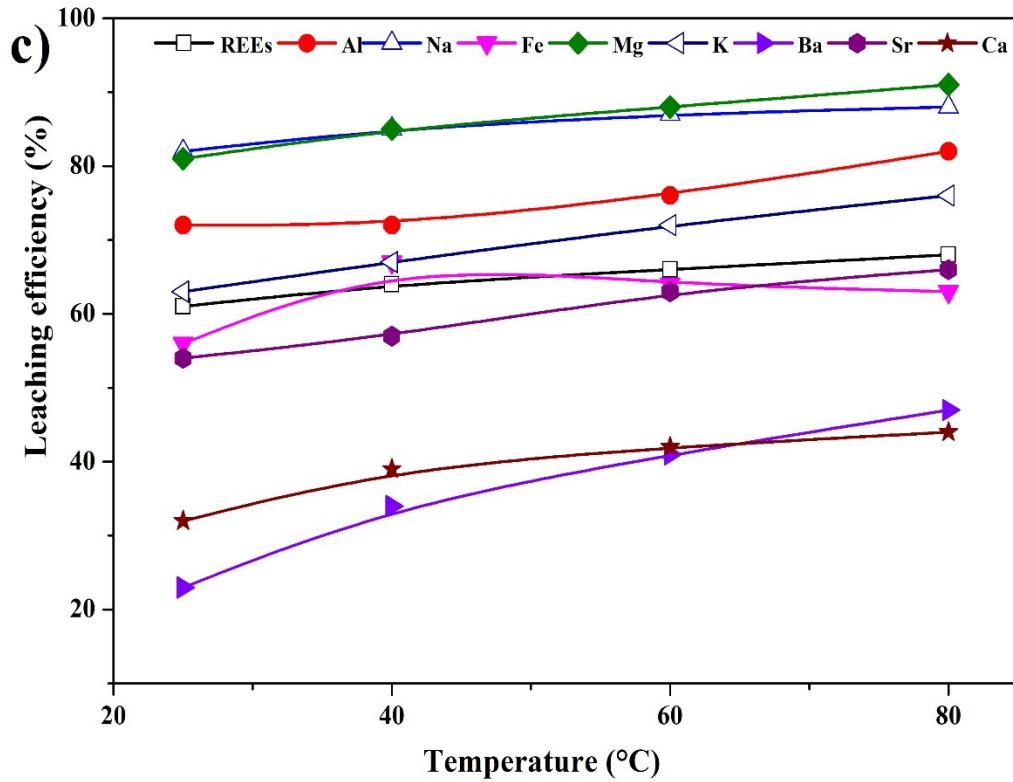

**Fig. S3.** Effect of temperature on the leaching efficiency of REEs and metals impurities in the range 25-80 °C using (a) MSA, (b) PTSA and (c) HCl (operating conditions : 2 M, 1/8, 120 min, 500 rpm).
